# Supplementary material for: Rapid stress hardening in the Antarctic midge improves male fertility by increasing courtship success and preventing decline of accessory gland proteins following cold exposure
Source: Oxford University Press journal article supplement (doi:10.1242/jeb.242506), 2021-06-21
Supplement: jeb242506supp.pdf [file jeb242506supp.pdf]

**Table S1.** Primers utilized for quantitative PCR studies.

|                          | <b>Forward</b>       | <b>Reverse</b>       |
|--------------------------|----------------------|----------------------|
| <b>IU25_04442-mRNA-1</b> | CGTCTTCAAGCCTTACAGGA | GTCTCGCAGAGTGATCGTTT |
| <b>IU25_01011-mRNA-1</b> | CACAATAAGTGGGGCTGAAC | TGATCACTCTGAAGCAACCA |
| <b>IU25_12518-mRNA-1</b> | CACAGCTTGGATTCTTAAC  | CTGATGCATGTGCATTAAC  |
| <b>IU25_12390-mRNA-1</b> | ATTACTGTGACCCAATCCTG | TGTTGTCTTCTGTCAGTTCG |
